# Supplementary material for: Exploring the Perceived Effectiveness of Applied Theater as a Maternal Health Promotion Tool in Rural Zambia
Source: PubMed Central journal article supplement — Qual Health Res. 2018 Sep 3;28(12):1933–43. doi: 10.1177/1049732318794207 (PMC6154221; doi:10.1177/1049732318794207), 2018-09-03
Supplement: Supplemental_materials_A_Table_1.pdf [file Supplemental_materials_A_Table_1.pdf]

Table 1

*Demographics for the 44 respondents*

|                       |                        | Frequency<br>(%) | Mean (SD)    |
|-----------------------|------------------------|------------------|--------------|
| <i>Age</i>            | 19 -29                 | 17 (38.6)        | 34.73 (11.8) |
|                       | 30-39                  | 11 (25.0)        |              |
|                       | 40-49                  | 10 (22,7)        |              |
|                       | 50-65                  | 6 (13,6)         |              |
| <i>Marital status</i> | Single                 | 3 (6.8)          |              |
|                       | Married                | 39 (88.6)        |              |
|                       | Widow                  | 1 (2.3)          |              |
|                       | Separated              | 1 (2.3)          |              |
| <i>Children</i>       | 0                      | 7 (15.9)         | 4.41 (3.98)  |
|                       | 1-5                    | 22 (50.0)        |              |
|                       | 6-10                   | 13 (29.5)        |              |
|                       | >10                    | 2 (4.6)          |              |
| <i>Education</i>      | Never attended school  | 3 (6.8)          |              |
|                       | Lower primary (1-4)    | 2 (4.5)          |              |
|                       | Upper primary (5-7)    | 10 (22.7)        |              |
|                       | Junior secondary (8-9) | 17 (38.6)        |              |
|                       | Senior secondary (10-  | 5 (11.4)         |              |
|                       | College                | 7 (15.9)         |              |
| <i>Occupation</i>     | Farmer                 | 24 (54.5)        |              |
|                       | Self-employed          | 6 (13.6)         |              |
|                       | Not employed           | 6 (13.6)         |              |
|                       | Formal employment      | 8 (18.2)         |              |
| <i>Monthly income</i> | <\$20                  | 10 (55.6)        |              |
|                       | \$20 - \$50            | 2 (11.1)         |              |
|                       | \$50 - \$100           | 2 (11.1)         |              |
|                       | \$100 - \$200          | 2 (11.1)         |              |
|                       | >\$200                 | 1 (5.6)          |              |
|                       | Unknown                | 1 (5.6)          |              |

*Note:* Respondents consisted of 18 expecting mothers, 7 husbands, 6 nurses, 4 headmen, and 9 theatre group members.
