# Supplementary material for: Exploring the Perceived Effectiveness of Applied Theater as a Maternal Health Promotion Tool in Rural Zambia
Source: PubMed Central journal article supplement — Qual Health Res. 2018 Sep 3;28(12):1933–43. doi: 10.1177/1049732318794207 (PMC6154221; doi:10.1177/1049732318794207), 2018-09-03
Supplement: Supplemental_materials_B_Interview_guides.pdf [file Supplemental_materials_B_Interview_guides.pdf]

## **A. Interview guide for pregnant women, husbands, nurses, and headmen**

*Note: This guide was adapted for the person being interviewed; such that husbands answered questions about their wife (and themselves), and nurses and headmen answered questions about pregnant women in their community.*

MW = maternity ward

MWH = maternity waiting home

### ***Section 1: Intention***

1. Where do you [your wife/pregnant women in the community] have the intention to deliver?
  - Why do you [your wife/pregnant women in the community] choose this place?
2. Do you [your wife/pregnant women in the community] have the intention to stay at the Maternal Waiting Homes while waiting to deliver?
  - Why do you [your wife/pregnant women in the community] choose to stay there? / Why do you [your wife/pregnant women in the community] choose *not* to stay there?

### ***Section 2: Determinants of intention***

#### ***A. Attitude***

1. What do you [your wife/pregnant women in the community] think about Maternity Ward?
  - Prompts: Which positive/negative aspects do you [your wife/pregnant women in the community] perceive?
2. What do you [your wife/pregnant women in the community] think about MWH?
  - Prompts: Which positive/negative aspects do you [your wife/pregnant women in the community] perceive?
3. What do you [your wife/pregnant women in the community] think about nurses?
4. What do you [your wife/pregnant women in the community] think of TBAs?

#### ***B. Risk perception***

1. Do you [your wife/pregnant women in the community] perceive you [your wife/pregnant women in the community] are at risk of developing pregnancy and childbirth complications?
  - Why? / Why not?
  - Which complications?

#### ***C. Perceived social norms***

1. In deciding where to deliver and the use of the MHW, do important others influence your [your wife's /pregnant women's] decision?
2. With whom do you [your wife/pregnant women in the community] discuss these topics?

3. Who encourages you [your wife/pregnant women in the community] to deliver at the maternity ward and who does not?

- Why do these people support you [your wife/pregnant women in the community] (or not)?

4. And regarding the stay at MHW?

- Why do these people support you [your wife/pregnant women in the community] (or not)?

5. Do think there are women in your community who have the intention to deliver at home?

- Why do you think these women make these decisions?

6. Do think there are women in your community who have the intention *not* to come stay at the MWH?

- Why do you think these women make this decision?

#### *D. Self-efficacy*

1. Which barriers or problems do you [your wife/pregnant women in the community] perceive in delivering at MW?

2. And in staying at the MHW while waiting for delivering?

3. Do you [does your wife/do pregnant women in the community] feel confident in overcoming these barriers?

- Why do you [your wife/pregnant women in the community] feel confident? /Why do you [your wife/pregnant women in the community] not feel confident?

### ***Section 3: Methods and application***

#### *A. Self-efficacy and possible methods*

1. Do you think there are women in the community who managed to overcome barriers to come to the maternity ward and deliver there?

- Yes: What do you want to learn from them?

- No: Why do you think this is the case?

2. Do you think there are pregnant women in the community who are not confident in overcoming these barriers?

- Why do you think these women managed?

3. What suggestions do you have for increasing a pregnant women's confidence in overcoming these obstacles?

#### *B. Modelling method and application*

1. Do you think that listening to or seeing how another woman has overcome these obstacles (to go to MW and deliver there, or to stay in the MWH and wait for delivery there) in the past could improve your [your wife's/pregnant women's] confidence in overcoming the same obstacles?

- How would you [your wife/pregnant women in the community] prefer to listen to this story?

*Prompt: in person (one-to-one), in television, in a play*

2. What do you [your wife/pregnant women in the community] think about seeing a theater play about such a story?

### *C. Role models: storylines*

1. Which of the following characters do you [your wife/pregnant women in the community] prefer?

- Why do you [your wife/pregnant women in the community] like this particular story?

- A pregnant woman who succeeded in overcoming obstacles [to go to MW for delivery or to come and wait in MWH for delivery] in the past, showing the strategies she used to overcome them.
- A pregnant woman who tried to overcome these obstacles but failed, showing the mistakes she made in trying
- A pregnant woman who decided to deliver at home and put herself in danger, showing the risks she [and the baby] faced by making this decision

### *D. Self-relevance and attainability*

1. Imagine a play about a pregnant woman who succeeds to overcome these obstacles [to go to MW for delivery or to come and wait in MWH for delivery].

- Would you prefer the pregnant woman in the play to have similar characteristics to you [your wife/pregnant women in the community]?

- If yes, in which aspects / how would she have to be similar?

- If not, why not?

2. Do you [your wife/pregnant women in the community] think you [your wife/pregnant women in the community] will feel more confident in overcoming these obstacles [to go to MW for delivery or to come and wait in MWH for delivery] if the pregnant woman in the play succeeded to overcome even more difficult obstacles than you [your wife/pregnant women in the community] are facing?

- Why does this make you [your wife/pregnant women in the community] feel confident?

/ Why does this not make you [your wife/pregnant women in the community] feel confident?

### *E. Suggestion for scenes and strategies*

- For the following scenes and questions, give as many examples and suggestions that you can think of:

1. Imagine a scene about a pregnant woman trying to find money for transportation, baby clothes, mattresses, blankets and food for her stay at the MW/MWH.

- Which strategies could she use to overcome these obstacles?

2. Imagine a scene about a husband and wife discussing the place of delivering.

- Which arguments should she use to convince him to deliver the baby at the maternity ward and stay at the MHW?

### ***Section 4: Structure and organization***

1. Which other characters do you [your wife/pregnant women in the community] think should be represented in this play?

- *Prompt: Only women, husbands, nurses, other member of the family*

2. How should the other characters in the play interact with the pregnant woman character?

3. Which relevant people should be invited to see the play? Why do you [your wife/pregnant women in the community] choose these people?  
- Prompt: *only women, only pregnant women, husbands, pregnant women's family members*

|                                                  |
|--------------------------------------------------|
| <b>Interview guide for theatre group members</b> |
|--------------------------------------------------|

***Section 1: Description of the project***

1. What kind of project are you involved in?
2. What are the objectives of your project?
3. How do you use theater in your current project?
4. How do you usually develop a play?
5. Can you provide an example of a play you (helped) developed about a health issue?
6. How do you recruit members?
7. Do these members have to follow any training?

***Section 2: Intention***

1. Where do pregnant women in your community usually intend to deliver?  
- Why do they make this decision?
2. Do you think most pregnant women have the intention to stay at the MWH while waiting to deliver?  
- Why do you think this is the case? / Why do you think this is not the case?

***Section 3: Attitude, methods and applications***

1. What do pregnant women think about nurses?
2. What positive/negative aspects do pregnant women perceive about nurses?
3. Do you have any suggestions to promote positive attitudes toward nurses?

*Imagine a play in which the main character is a nurse, showing her point of view, her positive aspects and the difficulties she faces every day in doing her job.*

4. Do you think that this could help mothers to develop a more positive attitude toward nurses?  
- Why do you think this could help? / Why don't you think this could help?

#### ***Section 4: Perceived social norms, methods and applications***

1. In deciding where to deliver, do you think important others influence pregnant women's decision?
2. And with regard to the decision to use a MWH?
3. Do you think there are important others who encourage them to deliver at home?
4. Do you have any suggestions to help pregnant women become less susceptible to pressure and more autonomous in their decision-making?

*Imagine a play which represents some of the types of pressures that pregnant women would face. In the play the main character (a pregnant woman) will provide argumentation to resist these social pressures, for example from a husband or a family member.*

5. Do you think this could represent a useful instrument for helping women to deal with social pressure?  
- Why do you think this is the case? / Why don't you think this is the case?

#### ***Section 5: Risk perception, methods and applications***

1. Do you think some women believe they are not at risk of developing pregnancy and childbirth complications?
2. Do you have any suggestions to make pregnant women more susceptible of pregnancy and childbirth complications?

*Imagine a play about a risk situation that pregnant woman might face, either during pregnancy or during delivery.*

3. What would this play look like?
4. Do you think such a play will make women more susceptible to the risks related to pregnancy and childbirth?  
- Why do you think that is the case? / Why don't you think that is the case?
5. Do you think pregnant women in the audience should make suggestions to the actors about what risk situation they would like to see in the play?  
- Why do you think that is the case? / Why don't you think that is the case?
6. Do you think that actors can improvise based on the risk situations the audience would like to see in the play?  
- Why do you think that is the case? / Why don't you think that is the case?

#### ***Section 6: Self-efficacy, methods and applications***

##### ***A. Self-efficacy and possible methods***

1. Which barriers or problems do pregnant women perceive in delivering at the MWH?
2. And in staying at the MWH while waiting for delivering?

3. Do you think there are pregnant women in the community who are not confident in overcoming these barriers?
4. What suggestions do you have for increasing a pregnant woman's confidence in overcoming these obstacles?

*B. Modelling method and application*

1. Do you think that listening to how another woman has overcome these obstacles in the past could improve confidence among pregnant women (and their husbands) in overcoming the same obstacles?
2. In what way / through which channel should this story be represented? Give as many examples as you can.
3. What do you think about making and performing a theater play about this story?

*C. Role models: storylines*

1. Which of the following characters do you prefer? (see below)
    - Why do you choose this example?
  2. And which do you prefer for pregnant women?
    - Why do you choose this example?
- A pregnant woman who succeeded in overcoming obstacles [to go to MW for delivery or to come and wait in MWH for delivery] in the past, showing the strategies she used to overcome them.
  - A pregnant woman who tried to overcome these obstacles but failed, showing the mistakes she made in trying
  - A pregnant woman who decided to deliver at home and put herself in danger, showing the risks she [and the baby] faced by making this decision

*Imagine a play about a pregnant woman who succeeds in overcoming the obstacles to deliver at MW or stay and wait at MWH for delivery.*

3. Would you prefer the pregnant woman in the play to have similar characteristics to pregnant women in the audience?
  - If yes, which aspects?
  - If not, why not?
4. What characteristics should the pregnant woman in the play have to make the audience think: 'I feel confident that I can achieve the same results'?

*Imagine a scene about a pregnant woman trying to find money for transportation, baby clothes, mattresses, blankets and food for her stay at the MW/MWH.*

4. Which strategies could this women use to overcome these obstacles?
5. How could you show these strategies in a play?

*Imagine a scene about a husband and wife discussing the place of delivering.*

6. Which arguments should and could the woman use to convince her husband she wants to deliver the baby at the maternity ward and stay at the MHW?
7. How could and would you show this in a play?

***Section 7: Structure and organization***

1. Which other characters do you think should be represented in a play about maternal healthcare and the importance of delivering at a clinic?

- *Prompt: Only women, husbands, nurses, other member of the family*

2. How should these other characters interact with the pregnant woman character?

3. Which relevant people should be invited to see the play?

- Why do you think those people should come and see the play as well?

- *Prompt: only women, only pregnant women, husbands, pregnant women's family members*
